# Supplementary material
Source: PubMed Central journal article supplement (PMC3632398)
Supplement: NIHMS435820-supplement-Suppl_6.pdf [file NIHMS435820-supplement-Suppl_6.pdf]

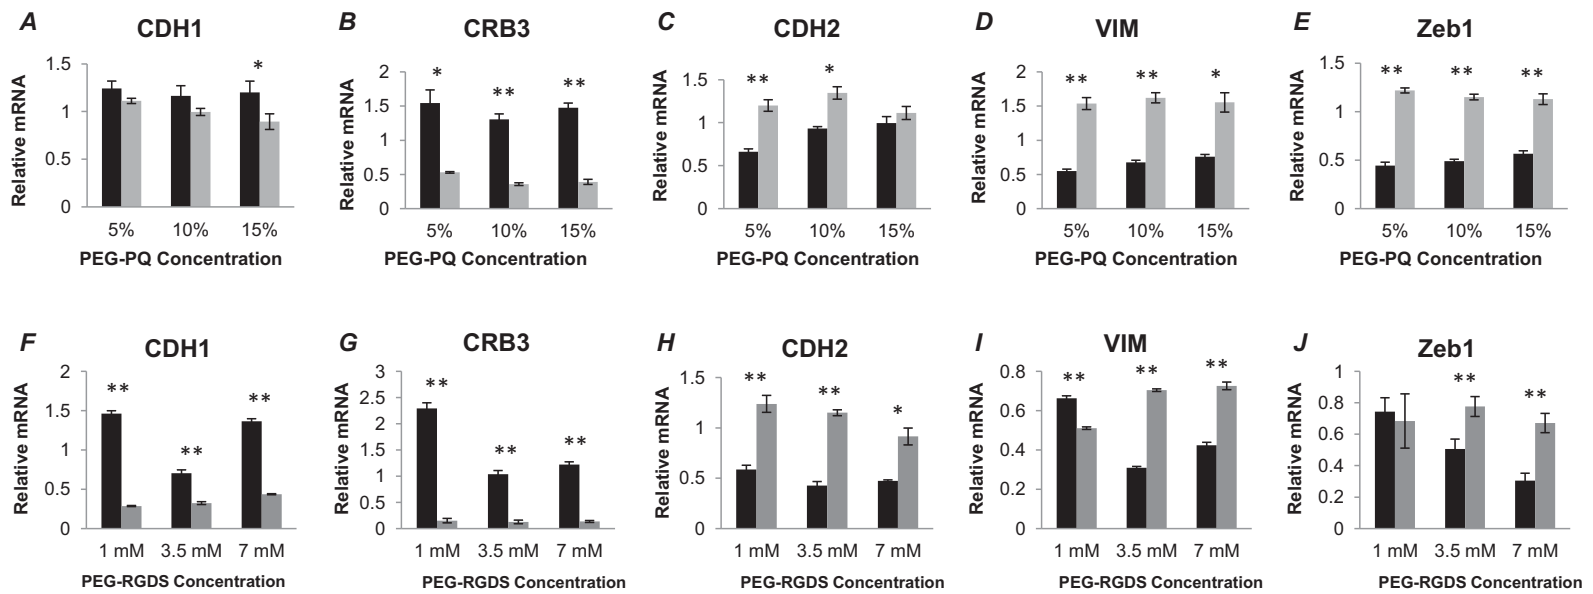

Figure S6: TGF $\beta$  induces changes in expression of EMT-related genes in PEG-encapsulated 344SQ. mRNA levels in matrices with 3.5 mM PEG-RGDS and varied stiffness (A-E) and matrices with fixed 5% PEG-PQ stiffness and varied PEG-RGDS concentration (F-J) before (black bars) and after (gray bars) TGF $\beta$  exposure show decreased expression of epithelial genes *CDH1* and *CRB3* (A-B, F-G) and increased expression of mesenchymal genes *CDH2*, *VIM*, *Zeb1* (C-E, H-J) in all matrix formulations following exposure consistent with EMT (\* $p < 0.05$ , \*\* $p < 0.01$ ). Levels relative to *L32* mRNA.
